# Supplementary material
Source: Springer Nature journal article supplement (https://www.springermedizin.de/resource/supplementary/13046_2010_367_MOESM3_ESM.pdf/9661868)
Supplement: MOESM3 [file 9661868]

Table 1. Genes whose expression is most related to good and poor prognosis  
And were combined to make the 20-gene signature

|                       | Gene ID# | Systemic_name  | Gene name/symbol | Average | 95% CI interval |        |
|-----------------------|----------|----------------|------------------|---------|-----------------|--------|
|                       |          |                |                  |         | Upper           | Lower  |
| <b>Poor prognosis</b> | 10855    | D43950         | KIAA0098         | -0.004  | 0.027           | -0.035 |
|                       | 19769    | U96131         | TRIP13           | -0.039  | -0.001          | -0.077 |
|                       | 14841    | NM_014865      | KIAA0159         | -0.007  | 0.029           | -0.044 |
|                       | 15318    | Contig55725_RC |                  | -0.219  | -0.150          | -0.289 |
|                       | 12548    | AF047002       | ALY              | -0.040  | -0.008          | -0.072 |
|                       | 3342     | NM_004111      | FEN1             | -0.028  | 0.003           | -0.058 |
|                       | 3493     | NM_004153      | ORC1L            | 0.037   | 0.057           | 0.017  |
|                       | 8204     | NM_004631      | LRP8             | 0.038   | 0.067           | 0.009  |
|                       | 3838     | NM_002794      | PSMB2            | -0.024  | 0.004           | -0.051 |
|                       | 3938     | Contig55771_RC |                  | -0.047  | -0.005          | -0.088 |
| <b>Good prognosis</b> | 6615     | NM_004496      | HNF3A            | -0.216  | -0.120          | -0.312 |
|                       | 8786     | NM_006113      | VAV3             | -0.170  | -0.107          | -0.232 |
|                       | 18817    | AL161983       |                  | -0.015  | 0.007           | -0.037 |
|                       | 17540    | NM_016613      | LOC51313         | -0.002  | 0.022           | -0.026 |
|                       | 1723     | AL133074       |                  | -0.078  | -0.033          | -0.123 |
|                       | 23117    | Contig14284_RC |                  | -0.324  | -0.209          | -0.440 |
|                       | 57       | Contig56678_RC |                  | -0.205  | -0.135          | -0.274 |
|                       | 18904    | NM_000125      | ESR1             | -0.312  | -0.215          | -0.409 |
|                       | 6709     | Contig57480_RC | LOC51028         | -0.021  | 0.009           | -0.051 |
|                       | 6105     | NM_005113      | GOLGA5           | -0.046  | -0.024          | -0.067 |

Table 2. Predictive ability of Aurora kinase A expression, 20-gene signature, and 70-gene signatures

| Test                      | Aurora kinase A (NKI dataset) | 20-gene (151 validation set) | 70-gene (NKI dataset) |
|---------------------------|-------------------------------|------------------------------|-----------------------|
| Predictive accuracy       | 0.64                          | 0.67                         | 0.61                  |
| Specificity               | 0.6                           | 0.66                         | 0.66                  |
| Positive predictive value | 0.4                           | 0.38                         | 0.4                   |

Table 3. Gene ontology of the 20-gene signature

| Gene ID# | Systemic_name  | Gene name/symbol | Biological Process                                                                                                                                                                                                                                                                                                                                                                          |
|----------|----------------|------------------|---------------------------------------------------------------------------------------------------------------------------------------------------------------------------------------------------------------------------------------------------------------------------------------------------------------------------------------------------------------------------------------------|
| 10855    | D43950         | KIAA0098         | Protein folding / Response to virus                                                                                                                                                                                                                                                                                                                                                         |
| 19769    | U96131         | TRIP13           | Double stranded break DNA repair / Meiosis I / Spermatogonial Development / Oocyte maturation / Pachytene (cell cycle) / Meiotic recombination / Transcription from RNA Pol II promoter                                                                                                                                                                                                     |
| 14841    | NM_014865      | KIAA0159         | N/A                                                                                                                                                                                                                                                                                                                                                                                         |
| 15318    | Contig55725_RC |                  | N/A                                                                                                                                                                                                                                                                                                                                                                                         |
| 12548    | AF047002       | ALY              | Interspecies interaction between organisms / Intronless viral mRNA export from nucleus / mRNA export from nucleus / mRNA processing / Transport                                                                                                                                                                                                                                             |
| 3342     | NM_004111      | FEN1             | DNA repair / DNA replication / Double stranded break DNA repair / UV protection / Phosphoinositide mediated signaling                                                                                                                                                                                                                                                                       |
| 3493     | NM_004153      | ORC1L            | DNA replication / DNA dependent DNA replication                                                                                                                                                                                                                                                                                                                                             |
| 8204     | NM_004631      | LRP8             | Cytokine mediated signaling pathway / Endocytosis / Hippocampus development / Layer formation in the cerebral cortex / Lipid metabolic process / Positive regulation of kinase activity / Proteolysis / Signal transduction                                                                                                                                                                 |
| 3838     | NM_002794      | PSMB2            | Anaphase-promoting complex-dependent proteosomal ubiquitin dependent protein catabolic process / Interspecies interaction between organisms / Negative regulation of ubiquitin ligase activity involved in mitotic cell entry / Positive regulation of ubiquitin ligase activity involved in mitotic cell entry / Proteolysis involved in cellular protein catabolic process                |
| 3938     | Contig55771_RC |                  | N/A                                                                                                                                                                                                                                                                                                                                                                                         |
| 6615     | NM_004496      | HNF3A            | Branching morphogenesis of a tube / Chromatin remodelling / Epithelial cell differentiation / Prostate gland development / Glucose homeostasis / Hormone metabolic process / Lung development / Multicellular organismal development / Negative regulation of survival gene product / Negative regulation of transcription from RNA pol II promoter / Neuron fate specification             |
| 8786     | NM_006113      | VAV3             | Angiogenesis / Apoptosis / Cell Migration / Induction of apoptosis by extracellular signals / Integrin mediated signaling pathway / Lamellipodium assembly / Positive regulation of cell adhesion / Positive regulation of PI3 kinase activity / Regulation of GTPase activity / Regulation of Rho protein signal transduction / Small GTPase mediated signal transduction / Vesicle fusion |
| 18817    | AL161983       |                  | Regulation of translation / Translation initiation                                                                                                                                                                                                                                                                                                                                          |
| 17540    | NM_016613      | LOC51313         | N/A                                                                                                                                                                                                                                                                                                                                                                                         |
| 1723     | AL133074       |                  | Apoptosis / Cell cycle arrest / Induction of apoptosis / Response to stress                                                                                                                                                                                                                                                                                                                 |
| 23117    | Contig14284_RC |                  | N/A                                                                                                                                                                                                                                                                                                                                                                                         |
| 57       | Contig56678_RC |                  | N/A                                                                                                                                                                                                                                                                                                                                                                                         |
| 18904    | NM_000125      | ESR1             | Androgen metabolic process / Antral ovarian follicle growth / Epithelial cell development / Epithelial cell proliferation involved in mammary gland duct elongation / Estrogen receptor signaling pathway / Male gonad development / Mammary gland alveolus development / Mammary gland branching involved in pregnancy / Neuroprotection / Osteoblast development                          |
| 6709     | Contig57480_RC | LOC51028         | N/A                                                                                                                                                                                                                                                                                                                                                                                         |
| 6105     | NM_005113      | GOLGA5           | Golgi organisation / Golgi vesicle transport / Protein amino acid phosphorylation / Retrograde transport, vesicle recycling within golgi                                                                                                                                                                                                                                                    |
